# Supplementary material for: Soluble syndecan-3 binds chemokines, reduces leukocyte migration in vitro and ameliorates disease severity in models of rheumatoid arthritis
Source: PubMed Central journal article supplement (PMC6625118; doi:10.1186/s13075-019-1939-2), 2019-07-12
Supplement: 13075_2019_1939_MOESM1_ESM.pdf [file 13075_2019_1939_MOESM1_ESM.pdf]

## Supplementary Material

**Table S1**

Supplementary table 1. Effects of TNF $\alpha$  on endothelial cell syndecan-3 RNA gene expression.

Endothelial cells were treated with and without TNF $\alpha$  [100 ng/ml] for up to 24 hours and RNA subjected to quantitative PCR. An ANOVA with Dunnet post-test did not give any significant differences between time points.

| Time (hours) | Mean $2^{-\Delta\Delta CT}$ | Std Error | Lower 95% CI of mean | Upper 95% CI of mean |
|--------------|-----------------------------|-----------|----------------------|----------------------|
| 0            | 1                           | 0         | 1                    | 1                    |
| 1            | 0.87                        | 0.05      | 0.64                 | 1.09                 |
| 2            | 1.02                        | 0.10      | 0.57                 | 1.47                 |
| 6            | 0.92                        | 0.09      | 0.53                 | 1.32                 |
| 24           | 0.92                        | 0.14      | 0.30                 | 1.55                 |
